# Supplementary material for: Pulmonary arterial remodeling induced by a Th2 immune response
Source: PubMed Central journal article supplement — J Exp Med. 2008 Feb 18;205(2):361–72. doi: 10.1084/jem.20071008 (PMC2271018; doi:10.1084/jem.20071008), 2008-02-18
Supplement: jexpmed_jem.20071008_10.pdf [file jexpmed_jem.20071008_10.pdf]

**Table S1.** Numbers of mice and microscopic view fields analyzed for pulmonary arterial muscularization by scoring

| Model               | Mice | Microscopic view fields |
|---------------------|------|-------------------------|
| Asp Ag <sup>a</sup> | 127  | 3,219 (24 per mouse)    |
| OVA <sup>a</sup>    | 43   | 1,050 (24 per mouse)    |
| IL-13 <sup>b</sup>  | 18   | 373 (21 per mouse)      |

The number of mice examined and the number of view fields scored (total number and mean number per mouse) are provided.

<sup>a</sup>Groups of wild-type or KO mice were given saline, or were primed and challenged with antigen and given nothing, control, or neutralizing antibody.

<sup>b</sup>Groups of naive, wild-type mice were challenged with control protein or recombinant IL-13.

**Table S2.** Right heart function, heart rate, right heart weight, and RVSP after acute exposure to hypoxia in OVA-primed mice exposed to saline or OVA aerosols

| Measure                  | Unit                  | Saline       | OVA          |
|--------------------------|-----------------------|--------------|--------------|
| Right heart function     | +dp/dt (mmHg/s)       | 1,213 ± 76   | 1,408 ± 110  |
|                          | -dp/dt (mmHg/s)       | -1,114 ± 100 | -1,224 ± 89  |
| Heart rate               | beats per minute      | 395 ± 45     | 395 ± 38     |
| RVSP after acute hypoxia | mmHg                  | 25.15 ± 0.36 | 25.81 ± 0.76 |
| Right heart weight       | % (RV/[LV + S]) × 100 | 19.89 ± 0.33 | 20.33 ± 0.63 |

Mice were primed with OVA-Alum and exposed to aerosols of saline or OVA, as shown in Fig. 8. The right ventricle was catheterized to determine right heart function, heart rate, and RVSP. The relative right ventricular weight was determined as a measure of right heart hypertrophy. Means and SEMs of 10 (right heart function, heart rate, and right heart weight) or 5-6 (RSVP) mice per group are shown. The data were not significantly different between the groups ( $P > 0.05$  according to a two-tailed, unpaired Wilcoxon U test).
